# Supplementary material for: The MARECA (national study of management of breast cancer locoregional recurrence and oncological outcomes) study: protocol for a prospective, multicentre cohort study
Source: PubMed Central journal article supplement (PMC10905491; doi:10.1097/sp9.0000000000000018), 2024-01-26
Supplement: sp9-28-20-s001.pdf [file sp9-28-20-s001.pdf]

# CASE REPORT FORM

## The MARECA study: National study of management of breast cancer locoregional recurrence and oncological outcome

### Eligibility check:

#### Inclusion criteria (tick box)

- Age ≥ 18yrs  Recently (within the last 6 months) diagnosed with new ipsilateral breast cancer locoregional recurrence +/- distant metastasis
- Treated for previous unilateral or bilateral breast cancer with curative intent
- No previous evidence of distant metastatic disease
- Able to provide informed consent
- Minimum of 3 months interval between the resection surgery for the original cancer and the diagnosis of locoregional recurrence (no maximum interval time period)

#### Exclusion criteria (tick box) If any of boxes are ticked, the patient is ineligible

- Patients where the new breast cancer is in the contralateral breast
- Patients diagnosed with distant metastasis with no evidence of locoregional recurrence
- Patients diagnosed with angiosarcoma
- Patients with a history of non-breast cancer which was non-curative in intent
- Previous ipsilateral surgery for atypia, benign conditions, or phyllodes tumour and other breast sarcomas AND no previous ipsilateral primary breast cancer resection

### Entry Details

|                                          |          |
|------------------------------------------|----------|
| Centre Name                              |          |
| Study. No                                |          |
| Name of person taking consent:           |          |
| Date of consent                          |          |
| Optional consent for tissue/slide access | Yes / No |

The following data regarding the patient's original and recurrent cancer can be collected once eligible patients have provided written consent. Please upload the data onto the REDCap database.

**Baseline Demographics (circle answers)**

|                                       |                                                     |                     |                |           |               |
|---------------------------------------|-----------------------------------------------------|---------------------|----------------|-----------|---------------|
| <b>Patient age:</b>                   | Yrs                                                 |                     |                |           |               |
| <b>Body mass index:</b>               |                                                     |                     |                |           |               |
| <b>Current Menopausal Status</b>      |                                                     |                     |                |           |               |
| 1 = pre-menopausal                    | 2 = post-menopausal                                 | 3 = peri-menopausal |                |           |               |
| <b>Smoking status:</b>                | Non-smoker                                          | Ex-smoker           | Current smoker |           |               |
| <b>ECOG performance status (0-4):</b> | 0                                                   | 1                   | 2              | 3         | 4             |
| <b>Family History:</b>                | unknown                                             | population risk     | moderate risk  | high risk | BRCA positive |
|                                       | other known breast cancer gene mutation (e.g. TP53) |                     |                |           |               |

**Surgery data - original cancer (circle answers)**

**Date of original breast cancer surgery:**

**Patient age at original diagnosis:**

**Presentation:** screen-detected      symptomatic

**Type of surgery:** Breast conserving surgery      Mastectomy + immediate reconstruction  
Mastectomy + delayed reconstruction  
Mastectomy + no reconstruction      No breast surgery

**If breast conserving surgery for invasive lobular cancer, was MRI performed:** Yes / No / N/A

**The original tumour location:** Upper inner quadrant      Upper outer quadrant  
Lower inner quadrant      Lower outer quadrant  
Subareolar or central

**Type of axilla surgery:** SLNB      ANC      ANS      targeted axillary dissection  
No axillary surgery

**If SLNB, method of localisation:** Dual technique with blue dye and radioisotope  
Radioisotope alone  
Blue dye alone  
Other methods

**Was the original cancer inflammatory breast cancer:** Yes / No

## Pathological Data - original cancer

|                                                                                                                        |                                              |                                                                                        |                                      |
|------------------------------------------------------------------------------------------------------------------------|----------------------------------------------|----------------------------------------------------------------------------------------|--------------------------------------|
| <b>Tumour subtype:</b>                                                                                                 | Invasive ductal<br>Other subtypes            | Invasive lobular<br>Pure DCIS                                                          | Mixed ductal/lobular                 |
| <b>Tumour grade:</b>                                                                                                   | 1<br>Low                                     | 2<br>Intermediate                                                                      | 3<br>High (if invasive)<br>(If DCIS) |
| <b>Tumour size:</b>                                                                                                    | ..... mm (invasive tumour size, unless DCIS) |                                                                                        |                                      |
| <b>Multifocal or multicentric cancer:</b>                                                                              | Yes                                          | No                                                                                     |                                      |
| <b>Lymphovascular invasion:</b>                                                                                        | Yes                                          | No                                                                                     |                                      |
| <b>Closest radial margin after final surgery:</b>                                                                      | ..... mm                                     |                                                                                        |                                      |
| <b>Were anterior or posterior margins close (1mm or less)?</b>                                                         | Yes                                          | No                                                                                     |                                      |
| If Yes, please state which (anterior / posterior / both) and distance in mm:                                           |                                              |                                                                                        | ..... mm                             |
| <b>State the number of positive axillary nodes:</b>                                                                    | .....                                        |                                                                                        |                                      |
| Please circle whether macrometastasis or micrometastasis                                                               |                                              |                                                                                        |                                      |
| <b>Please state the number of nodes retrieved:</b>                                                                     | .....                                        |                                                                                        |                                      |
| <b>ER receptor Allred score:</b>                                                                                       | 0 1 2 3 4 5 6 7 8                            | (please state if any other scoring system was used and its score; e.g. H-score; .....) |                                      |
| <b>PR receptor Allred score:</b>                                                                                       | 0 1 2 3 4 5 6 7 8                            | (please state if any other scoring system was used and its score; e.g. H-score; .....) |                                      |
| <b>Her2 receptor:</b>                                                                                                  | Positive                                     | Negative                                                                               |                                      |
| Please state immunohistochemistry score 0 1+ 2+ 3+                                                                     |                                              |                                                                                        |                                      |
| If 2+. was FISH test done? What was the final HER2 receptor status if FISH test done; positive/negative/not applicable |                                              |                                                                                        |                                      |
| <b>Ki67 (if performed, please state percentage):</b>                                                                   | ..... %                                      |                                                                                        |                                      |

**Adjuvant Treatments - original cancer (circle answers)**

**Radiotherapy post-BCS:** Yes No N/A  
**Radiotherapy post-mastectomy:** Yes No N/A  
**Radiotherapy to the axilla:** Yes No  
**Radiotherapy to SCF:** Yes No  
**Radiotherapy to IMN:** Yes No

**If radiotherapy after BCS, state regimen:**

WBRT; 40 Gy 15 fractions                      WBRT; 27 Gy 5 fractions (hypofractionated)  
Partial breast radiotherapy                      WBRT with boost

**Endocrine Therapy:** Yes No (If Yes, state total duration received: ..... Yrs)

**Please state 1<sup>st</sup> line endocrine therapy:** Tamoxifen Letrozole Anastrozole  
Exemestane Ovarian supression Others

Please state duration: ..... Yrs

**Please state 2nd line endocrine therapy (if applicable):** Tamoxifen Letrozole Anastrozole  
Exemestane Ovarian supression Others

Please state duration: ..... Yrs (if applicable)

**Chemotherapy:** Yes No (If Yes, circle Adjuvant / Neoadjuvant)

**Usage of Oncotype Dx or other predictive test:** Yes No

If Yes, please state test used and score: .....

**Please select which chemotherapy agents the patient received:**

Epirubicin / Doxorubicin / Cyclophosphamide / Docetaxel / Paclitaxel / Carboplatin / Capecitabine /  
Others; please state

**Please state if chemotherapy was stopped early:** Yes No

**Anti-HER2 therapy:** Yes No

If Yes, please state regimen: **Trastuzumab (Herceptin)**  
**Trastuzumab (Herceptin) + Pertuzumab (Perjeta)**

**Bisphosphonates:** Yes No

## Locoregional recurrence treatment details (circle answers)

### Diagnosis

|                                                                                                                        |                       |                                    |                                                                                                      |
|------------------------------------------------------------------------------------------------------------------------|-----------------------|------------------------------------|------------------------------------------------------------------------------------------------------|
| <b>Date of locoregional recurrence diagnosis:</b>                                                                      |                       | <b>Age at diagnosis: ..... Yrs</b> |                                                                                                      |
| <b>Presentation:</b>                                                                                                   | screen-detected       | symptomatic                        |                                                                                                      |
| <b>Tumour subtype:</b>                                                                                                 | Invasive ductal       | Invasive lobular                   | Mixed ductal/lobular                                                                                 |
|                                                                                                                        | Other subtypes        | Pure DCIS                          |                                                                                                      |
| <b>If invasive cancer diagnosis, was there associated DCIS:</b>                                                        |                       | Yes                                | No                                                                                                   |
| <b>Tumour grade:</b>                                                                                                   | 1                     | 2                                  | 3 (if invasive)                                                                                      |
|                                                                                                                        | Low                   | Intermediate                       | High (If DCIS)                                                                                       |
| <b>ER receptor Allred score:</b>                                                                                       | 0                     | 1                                  | 2 3 4 5 6 7 8 (please state if any other scoring system was used and its score; e.g. H-score; .....) |
| <b>PR receptor Allred score:</b>                                                                                       | 0                     | 1                                  | 2 3 4 5 6 7 8 (please state if any other scoring system was used and its score; e.g. H-score; .....) |
| <b>Her2 receptor:</b>                                                                                                  | Positive              | Negative                           |                                                                                                      |
| Please state immunohistochemistry score 0 1+ 2+ 3+                                                                     |                       |                                    |                                                                                                      |
| If 2+. was FISH test done? What was the final HER2 receptor status if FISH test done; positive/negative/not applicable |                       |                                    |                                                                                                      |
| <b>Ki67 (if performed, please state percentage): ..... %</b>                                                           |                       |                                    |                                                                                                      |
| <b>If patient had BCS for the original cancer, please state the tumour location of the recurrent cancer:</b>           |                       |                                    |                                                                                                      |
|                                                                                                                        | Upper inner quadrant  | Upper outer quadrant               |                                                                                                      |
|                                                                                                                        | Lower inner quadrant  | Lower outer quadrant               |                                                                                                      |
|                                                                                                                        | Subareolar or central | N/A                                |                                                                                                      |

**Radiology:**

**Site(s) of locoregional recurrence (please circle all that applies):**

breast / skin / chest wall / axilla / internal mammary nodes / supraclavicular nodes /  
infraclavicular nodes

If breast LRR, state the maximal tumour size on imaging: ..... mm

**Axilla ultrasound scan:** Yes No

If yes, was it reported as normal: Yes No

If reported as abnormal, what was the FNA/core biopsy result:

C1 C2 C3 C4 C5

B1 B2 B3 B4 B5

**Staging investigation** Yes No

**If Yes, please circle modality used:** CT CT + Bone scan PET CT Others

**Did staging reveal distant metastasis** Yes No

**If Yes, please circle site(s):** Bone Brain Liver Lung Other sites

**Was cancer resection surgery performed in the presence of distant metastasis:** Yes No

**Was Neoadjuvant systematic therapy used:** No NACT NAET CDK inhibitors Others

**Surgery for locoregional recurrence:**

**Surgery for locoregional recurrence**    Yes    No    (If Yes, please state date:    )

**If no surgery for locoregional recurrence, please state reason;**

Unresectable    Patient unfit for surgery    Patient choice    Concurrent distant metastasis  
Commenced systemic therapy first    Other reasons (please specify)

**Type of breast surgery:**    None    Simple mastectomy    Repeat BCS  
WLE of skin flap or chest wall recurrence (direct closure / skin graft / flap closure)  
Mastectomy with deconstruction (taking down previous recon)  
Mastectomy with IBR: Implant    Fully autologous    Autologous + implant

**Planned axillary surgery:**    SLNB (no previous axillary surgery)    Repeat SLNB  
ANS    ANC    TAD    None  
Axillary exploration after previous ANC    Others

**If repeat SLNB, method of localisation:**    Dual technique with blue dye and radioisotope  
Radioisotope alone  
Blue dye alone  
Other methods

**If repeat SLNB, was the sentinel lymph node identified:**    Yes    No

**If repeat SLNB failed to identify the sentinel lymph node, how did you proceed:**

No further axillary dissection    ANS    ANC



**Further pathology on locoregional recurrence:**

**Multifocal or multicentric cancer:**                      Yes              No

**Lymphovascular invasion:**                                      Yes              No

**Tumour size:**              ..... mm (invasive size, unless DCIS)

**Closest radial margin:**              ..... mm

**Were anterior or posterior margins close (1mm or less)?**              Yes              No

**If Yes, please state which (anterior / posterior / both) and distance in mm:**              ..... mm

**State the number of positive axillary nodes:**              .....

**Please circle whether macrometastasis or micrometastasis**

**Please state the number of nodes retrieved:**              .....

**Further locoregional and systemic treatment (including further surgery)**

**Further surgery to the breast** Yes No  
**If Yes, please state the type of further surgery** Margin re-excision Mastectomy

**Further axillary surgery** Yes No  
**If Yes, please state the type of further surgery** ANC SLNB ANS

**Receipt of breast radiotherapy** Yes No N/A

**If radiotherapy after BCS, please state regimen:**

WBRT; 40 Gy 15 fractions WBRT; 27 Gy 5 fractions (hypofractionated)  
 Partial breast radiotherapy WBRT with boost

**Radiotherapy post-mastectomy:** Yes No N/A  
**Radiotherapy to the axilla:** Yes No  
**Radiotherapy to SCF:** Yes No  
**Radiotherapy to IMN:** Yes No

**Endocrine Therapy:** Yes No (If Yes, state duration recommended at MDT: ..... Yrs)

**If Yes, please state the prescribed endocrine therapy:** Tamoxifen Letrozole Anastrozole  
 Exemestane Ovarian suppression Others

**Chemotherapy:** Yes No

**Please select which chemotherapy agents the patient received:**

Epirubicin / Doxorubicin / Cyclophosphamide / Docetaxel / Paclitaxel / Carboplatin / Capecitabine /  
 Others; please state

**Anti-HER2 therapy:** Yes No

If Yes, please state regimen: **Trastuzumab (Herceptin)**  
**Trastuzumab (Herceptin) + Pertuzumab (Perjeta)**

**Other targeted treatment** Yes No

**If Yes, please specify**

### 3 and 5 year data collection

Patient alive: Yes No

If Death, was it related to breast cancer: Yes No

If no, please state the cause of death:

Please state the date of death:

Any further locoregional recurrence +/- distant metastasis Yes No

Please state the date of further locoregional recurrence:

Please state the date of distant metastasis:

**Full details will require uploading to REDCap**
